# Supplementary material
Source: PubMed Central journal article supplement (PMC6462016)
Supplement: 41401_2018_15_MOESM3_ESM.pdf [file 41401_2018_15_MOESM3_ESM.pdf]

**Supplementary Table S2.** Clinical characteristics of breast tissue microarray containing breast carcinoma tissue, carcinoma metastatic to lymph nodes, and normal tissue samples

| <b>No.</b> | <b>Age</b> | <b>Sex</b> | <b>Organ</b> | <b>Pathology diagnosis</b>                         | <b>Grade</b> |
|------------|------------|------------|--------------|----------------------------------------------------|--------------|
| 01         | 43         | F          | Breast       | Little nonspecific infiltrating ductal carcinoma   | I            |
| 02         | 40         | F          | Breast       | A little nonspecific infiltrating ductal carcinoma | I            |
| 03         | 54         | F          | Breast       | Nonspecific infiltrating ductal carcinoma          | I            |
| 04         | 44         | F          | Breast       | Nonspecific infiltrating ductal carcinoma          | I            |
| 05         | 41         | F          | Breast       | Nonspecific infiltrating ductal carcinoma          | I            |
| 06         | 63         | F          | Breast       | Nonspecific infiltrating ductal carcinoma          | I            |
| 07         | 44         | F          | Breast       | Nonspecific infiltrating ductal carcinoma          | I            |
| 08         | 60         | F          | Breast       | Little nonspecific infiltrating ductal carcinoma   | I            |
| 09         | 29         | F          | Breast       | Nonspecific infiltrating ductal carcinoma          | I-II         |
| 10         | 55         | F          | Breast       | Nonspecific infiltrating ductal carcinoma          | I            |
| 11         | 63         | F          | Breast       | Nonspecific infiltrating ductal carcinoma          | I            |
| 12         | 44         | F          | Breast       | Nonspecific infiltrating ductal carcinoma          | II           |
| 13         | 52         | F          | Breast       | Nonspecific infiltrating ductal carcinoma          | II           |

---

|    |    |   |        |                                          |        |      |
|----|----|---|--------|------------------------------------------|--------|------|
| 14 | 70 | F | Breast | Nonspecific<br>infiltrating<br>carcinoma | ductal | II   |
| 15 | 50 | F | Breast | Nonspecific<br>infiltrating<br>carcinoma | ductal | II   |
| 16 | 60 | F | Breast | Nonspecific<br>infiltrating<br>carcinoma | ductal | II   |
| 17 | 48 | F | Breast | Nonspecific<br>infiltrating<br>carcinoma | ductal | II   |
| 18 | 38 | F | Breast | Nonspecific<br>infiltrating<br>carcinoma | ductal | II   |
| 19 | 48 | F | Breast | Nonspecific<br>infiltrating<br>carcinoma | ductal | II   |
| 20 | 33 | F | Breast | Nonspecific<br>infiltrating<br>carcinoma | ductal | II   |
| 21 | 40 | F | Breast | Nonspecific<br>infiltrating<br>carcinoma | ductal | II   |
| 22 | 46 | F | Breast | Nonspecific<br>infiltrating<br>carcinoma | ductal | II   |
| 23 | 43 | F | Breast | Nonspecific<br>infiltrating<br>carcinoma | ductal | II   |
| 24 | 61 | F | Breast | Nonspecific<br>infiltrating<br>carcinoma | ductal | I-II |
| 25 | 41 | F | Breast | Nonspecific<br>infiltrating<br>carcinoma | ductal | I    |
| 26 | 58 | F | Breast | Nonspecific<br>infiltrating<br>carcinoma | ductal | II   |
| 27 | 57 | F | Breast | Nonspecific<br>infiltrating<br>carcinoma | ductal | I    |
| 28 | 45 | F | Breast | Nonspecific<br>infiltrating              | ductal | II   |

---

---

|    |    |   |        |                                                   |        |        |
|----|----|---|--------|---------------------------------------------------|--------|--------|
| 29 | 53 | F | Breast | carcinoma<br>Nonspecific<br>infiltrating          | ductal | II     |
| 30 | 47 | F | Breast | carcinoma<br>Nonspecific<br>infiltrating          | ductal | II     |
| 31 | 34 | F | Breast | carcinoma<br>Nonspecific<br>infiltrating          | ductal | II     |
| 32 | 49 | F | Breast | carcinoma<br>A little nonspecific<br>infiltrating | ductal | -      |
| 33 | 39 | F | Breast | carcinoma<br>Nonspecific<br>infiltrating          | ductal | II     |
| 34 | 53 | F | Breast | carcinoma<br>Nonspecific<br>infiltrating          | ductal | II     |
| 35 | 37 | F | Breast | carcinoma<br>A little nonspecific<br>infiltrating | ductal | -      |
| 36 | 62 | F | Breast | carcinoma<br>Nonspecific<br>infiltrating          | ductal | III    |
| 37 | 50 | F | Breast | carcinoma<br>A little nonspecific<br>infiltrating | ductal | III    |
| 38 | 43 | F | Breast | carcinoma<br>Nonspecific<br>infiltrating          | ductal | III    |
| 39 | 45 | F | Breast | carcinoma<br>Nonspecific<br>infiltrating          | ductal | III    |
| 40 | 45 | F | Breast | carcinoma<br>Nonspecific<br>infiltrating          | ductal | III    |
| 41 | 46 | F | Breast | carcinoma<br>Nonspecific<br>infiltrating          | ductal | II-III |
| 42 | 46 | F | Breast | carcinoma<br>Nonspecific<br>infiltrating          | ductal | III    |
| 43 | 64 | F | Breast | carcinoma<br>Nonspecific                          |        | III    |

---

---

|    |    |   |            |                                                                   |    |
|----|----|---|------------|-------------------------------------------------------------------|----|
|    |    |   |            | infiltrating ductal carcinoma                                     |    |
| 44 | 32 | F | Breast     | Neuroendocrine carcinoma                                          | II |
| 45 | 51 | F | Breast     | Infiltrating ductal carcinoma with neuroendocrine differentiation | -  |
| 46 | 40 | F | Breast     | Breast tissue                                                     | -  |
| 47 | 36 | F | Breast     | Medullary carcinoma                                               | -  |
| 48 | 55 | F | Breast     | Medullary carcinoma                                               | -  |
| 49 | 58 | F | Breast     | Medullary carcinoma                                               | -  |
| 50 | 68 | F | Breast     | Little medullary carcinoma                                        | -  |
| 51 | 33 | F | Lymph node | Metastatic nonspecific infiltrating ductal carcinoma              | -  |
| 52 | 41 | F | Lymph node | Metastatic nonspecific infiltrating ductal carcinoma              | -  |
| 53 | 50 | F | Lymph node | Metastatic nonspecific infiltrating ductal carcinoma              | -  |
| 54 | 61 | F | Lymph node | Metastatic nonspecific infiltrating ductal carcinoma              | -  |
| 55 | 57 | F | Lymph node | Metastatic nonspecific infiltrating ductal carcinoma              | -  |
| 56 | 53 | F | Lymph node | Metastatic nonspecific infiltrating ductal carcinoma              | -  |
| 57 | 38 | F | Lymph node | Metastatic nonspecific infiltrating ductal carcinoma              | -  |
| 58 | 52 | F | Lymph node | Metastatic nonspecific infiltrating ductal carcinoma              | -  |
| 59 | 46 | F | Lymph node | A little metastatic nonspecific infiltrating ductal carcinoma     | -  |
| 60 | 39 | F | Lymph node | Metastatic nonspecific infiltrating ductal carcinoma              | -  |

---

---

|    |    |   |            |                                                               |   |
|----|----|---|------------|---------------------------------------------------------------|---|
|    |    |   |            | carcinoma                                                     |   |
| 61 | 51 | F | Lymph node | Metastatic nonspecific infiltrating ductal carcinoma          | - |
| 62 | 39 | F | Lymph node | Metastatic nonspecific infiltrating ductal carcinoma          | - |
| 63 | 34 | F | Lymph node | Metastatic nonspecific infiltrating ductal carcinoma          | - |
| 64 | 50 | F | Lymph node | Metastatic nonspecific infiltrating ductal carcinoma          | - |
| 65 | 38 | F | Lymph node | Metastatic nonspecific infiltrating ductal carcinoma          | - |
| 66 | 41 | F | Lymph node | Metastatic nonspecific infiltrating ductal carcinoma          | - |
| 67 | 46 | F | Lymph node | Metastatic nonspecific infiltrating ductal carcinoma          | - |
| 68 | 29 | F | Lymph node | Metastatic nonspecific infiltrating ductal carcinoma          | - |
| 69 | 47 | F | Lymph node | Lymph node tissue                                             | - |
| 70 | 35 | F | Lymph node | Metastatic nonspecific infiltrating ductal carcinoma          | - |
| 71 | 57 | F | Lymph node | Metastatic nonspecific infiltrating ductal carcinoma          | - |
| 72 | 53 | F | Lymph node | Metastatic lobular carcinoma                                  | - |
| 73 | 50 | F | Lymph node | Fibrofatty tissue                                             | - |
| 74 | 45 | F | Lymph node | A little metastatic nonspecific infiltrating ductal carcinoma | - |
| 75 | 58 | F | Lymph node | Metastatic nonspecific infiltrating ductal carcinoma          | - |

---

---

|    |    |   |            |                                               |                    |   |
|----|----|---|------------|-----------------------------------------------|--------------------|---|
| 76 | 57 | F | Lymph node | Metastatic infiltrating carcinoma             | nonspecific ductal | - |
| 77 | 49 | F | Lymph node | Metastatic infiltrating carcinoma             | nonspecific ductal | - |
| 78 | 76 | F | Lymph node | Metastatic infiltrating carcinoma             | nonspecific ductal | - |
| 79 | 48 | F | Lymph node | Metastatic infiltrating carcinoma             | nonspecific ductal | - |
| 80 | 57 | F | Lymph node | Metastatic infiltrating carcinoma             | nonspecific ductal | - |
| 81 | 46 | F | Lymph node | Metastatic infiltrating carcinoma             | nonspecific ductal | - |
| 82 | 56 | F | Lymph node | Metastatic carcinoma                          | medullary          | - |
| 83 | 42 | F | Lymph node | Metastatic infiltrating carcinoma             | nonspecific ductal | - |
| 84 | 49 | F | Lymph node | Metastatic carcinoma                          | lobular            | - |
| 85 | 42 | F | Lymph node | Metastatic infiltrating carcinoma             | nonspecific ductal | - |
| 86 | 51 | F | Lymph node | Metastatic infiltrating carcinoma             | nonspecific ductal | - |
| 87 | 47 | F | Lymph node | A little infiltrating carcinoma with necrosis | metastatic ductal  | - |
| 88 | 47 | F | Lymph node | Metastatic infiltrating carcinoma             | nonspecific ductal | - |
| 89 | 47 | F | Lymph node | Metastatic infiltrating carcinoma             | nonspecific ductal | - |
| 90 | 36 | F | Lymph node | Metastatic infiltrating carcinoma             | nonspecific ductal | - |

---

---

|     |    |   |        |                |   |
|-----|----|---|--------|----------------|---|
| 91  | 36 | F | Breast | Breast tissue  | - |
| 92  | 15 | F | Breast | Fibrous tissue | - |
| 93  | 21 | F | Breast | Breast tissue  | - |
| 94  | 42 | F | Breast | Breast tissue  | - |
| 95  | 37 | F | Breast | Fibrous tissue | - |
| 96  | 51 | F | Breast | Breast tissue  | - |
| 97  | 43 | F | Breast | Breast tissue  | - |
| 98  | 43 | F | Breast | Breast tissue  | - |
| 99  | 35 | F | Breast | Breast tissue  | - |
| 100 | 42 | F | Breast | Breast tissue  | - |

---

Note: “-” in Grade means no grading available.
