# Supplementary material
Source: PubMed Central journal article supplement (PMC6462016)
Supplement: 41401_2018_15_MOESM4_ESM.pdf [file 41401_2018_15_MOESM4_ESM.pdf]

**Supplementary Table S3. The expression of HBXIP was positively associated with that of PKM2 in breast tissue samples.**

| Breast tissues |   |       | PKM2 |    |    | Total |
|----------------|---|-------|------|----|----|-------|
|                |   |       | 0    | 1  | 2  |       |
| HBXIP          | 0 | Count | 12   | 8  | 1  | 21    |
|                | 1 | Count | 5    | 27 | 12 | 44    |
|                | 2 | Count | 2    | 15 | 18 | 35    |
| Total          |   |       | 19   | 50 | 31 | 100   |

The expression of HBXIP and PKM2 was immunohistochemically examined by tissue microarray with 100 breast tissue samples containing 49 primary breast carcinomas, 13 normal tissues and 38 metastatic lymph nodes in breast cancer. The association between HBXIP and PKM2 expression was statistically analyzed by Pearson chi-square independence test,  $\chi^2 = 32.34$ ,  $P < 0.001$ .
